# Supplementary material for: TCP1 promotes the progression of malignant tumors by stabilizing c-Myc through the AKT/GSK-3β and ERK signaling pathways
Source: Research Square preprint supplement (doi:10.21203/rs.3.rs-1742161/v1), 2022-08-01
Supplement: Supplementary file 1 [file 3f089df44e7994ccaf31ee81.pdf]

**Table S1. Antibodies used for western blot or immunoprecipitation**

| Antibody                 | Company          | Cat. No.   | Species | Dilution |
|--------------------------|------------------|------------|---------|----------|
| TCP-1 alpha              | Abcam            | ab92587    | Rabbit  | 1:1000   |
| p-AKT (Ser473)           | Cell signaling   | 4060       | Rabbit  | 1:1000   |
| p-GSK-3 $\beta$ (Ser9)   | Cell signaling   | 5558       | Rabbit  | 1:1000   |
| p-c-Myc (Thr58)          | Cell signaling   | 46650      | Rabbit  | 1:1000   |
| GSK-3 $\beta$            | Cell signaling   | 12456      | Rabbit  | 1:1000   |
| p-ERK1/2                 | Cell signaling   | 4370       | Rabbit  | 1:1000   |
| AKT                      | Proteintech      | 10176-2-AP | Rabbit  | 1:1000   |
| c-Myc                    | Proteintech      | 10828-1-AP | Rabbit  | 1:1000   |
| ERK1/2                   | Proteintech      | 11257-1-AP | Rabbit  | 1:1000   |
| p-c-Myc (Ser62)          | ABclonal         | AP0989     | Rabbit  | 1:1000   |
| p-GSK-3 $\beta$ (Tyr216) | ABclonal         | AP0261     | Rabbit  | 1:1000   |
| GAPDH                    | TransGen Biotech | HC301-01   | Mouse   | 1:5000   |

**Table S2. Primers used for qRT-PCR**

|       |         |                         |
|-------|---------|-------------------------|
| TCP1  | Forward | TCTCTTGGTCCAGTTGGCTTG   |
|       | Reverse | GATATAACGCACTGCTTCCTTGC |
| c-Myc | Forward | CTCTCCGTCCTCGGATTCTC    |
|       | Reverse | ATCTTCTTGTTCTCCTCAGAGTC |
| GAPDH | Forward | ACTAGGCGCTCACTGTTCTC    |
|       | Reverse | GATCTCGCTCCTGGAAGATGG   |

Supplementary Figure 1

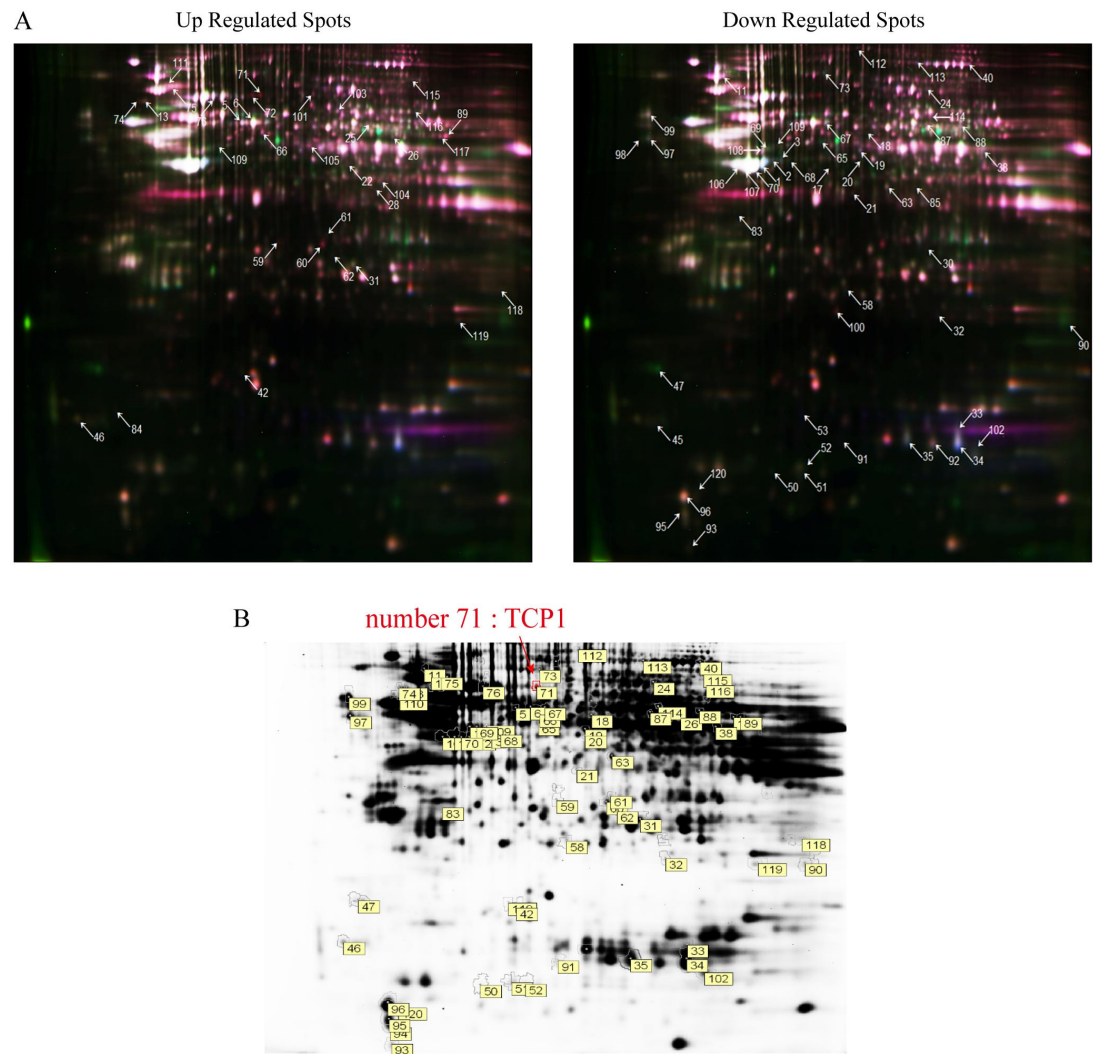

Supplementary Figure 2

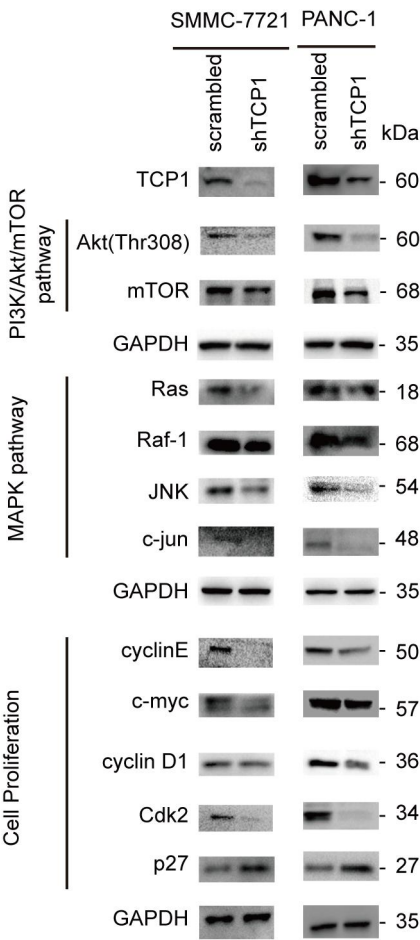

## **Supplementary figure legends**

**Supplementary Figure 1.** TCP1 was selected in HL-60 cells with high tumorigenic potential. **a.** Differentially expressed protein spots marked with master numbers displayed in 2D-DIGE images. The arrows indicate the 33 significantly upregulated protein spots (marked with master numbers) and 54 downregulated protein spots (marked with master numbers) displayed in 2D-DIGE images. **b.** Proteomic analysis of HL-60 cells using 2D-DIGE. The arrows indicate protein spots that differed significantly between the HL-60 cells and the control cells. Relative spot intensity was calculated on the basis of the spot volume. Only the spots indicated with arrows were used for identification.

**Supplementary Figure 2.** TCP1 regulates multiple cancer driving signaling pathways in HCC and PDAC cells. SMMC-7721 and PANC-1 cells were infected with lentiviruses expressing control or TCP1 shRNA, then cell lysates were subjected to Western blot analysis with antibodies against various proteins indicated. The levels of proteins in PI3K/Akt pathway, MAPK pathway and the key genes of cell proliferation were detected.
