# Supplementary material for: TCP1 promotes the progression of malignant tumors by stabilizing c-Myc through the AKT/GSK-3β and ERK signaling pathways
Source: Research Square preprint supplement (doi:10.21203/rs.3.rs-1742161/v1), 2022-08-01
Supplement: Supplementary file 1 [file a4407aa2875f2d470d164d71.docx]

| **Table S1. Antibodies used for western blot or immunoprecipitation** | | | | |
| --- | --- | --- | --- | --- |
| **Antibody** | **Company** | **Cat. No.** | **Species** | **Dilution** |
| TCP-1 alpha | Abcam | ab92587 | Rabbit | 1:1000 |
| p-AKT (Ser473) | Cell signaling | 4060 | Rabbit | 1:1000 |
| p-GSK-3β (Ser9) | Cell signaling | 5558 | Rabbit | 1:1000 |
| p-c-Myc (Thr58) | Cell signaling | 46650 | Rabbit | 1:1000 |
| GSK-3β | Cell signaling | 12456 | Rabbit | 1:1000 |
| p-ERK1/2 | Cell signaling | 4370 | Rabbit | 1:1000 |
| AKT | Proteintech | 10176-2-AP | Rabbit | 1:1000 |
| c-Myc | Proteintech | 10828-1-AP | Rabbit | 1:1000 |
| ERK1/2 | Proteintech | 11257-1-AP | Rabbit | 1:1000 |
| p-c-Myc (Ser62) | ABclonal | AP0989 | Rabbit | 1:1000 |
| p-GSK-3β (Tyr216) | ABclonal | AP0261 | Rabbit | 1:1000 |
| GAPDH | TransGen Biotech | HC301-01 | Mouse | 1:5000 |
