# Supplementary material for: TCP1 promotes the progression of malignant tumors by stabilizing c-Myc through the AKT/GSK-3β and ERK signaling pathways
Source: Research Square preprint supplement (doi:10.21203/rs.3.rs-1742161/v1), 2022-08-01
Supplement: Supplementary file 2 [file eef51c0218346bfa02313fc1.docx]

| **Table S2. Primers used for qRT-PCR** | | |
| --- | --- | --- |
| TCP1 | Forward | TCTCTTGGTCCAGTTGGCTTG |
|  | Reverse | GATATAACGCACTGCTTCCTTGC |
| c-Myc | Forward | CTCTCCGTCCTCGGATTCTC |
|  | Reverse | ATCTTCTTGTTCCTCCTCAGAGTC |
| GAPDH | Forward | ACTAGGCGCTCACTGTTCTC |
|  | Reverse | GATCTCGCTCCTGGAAGATGG |
